# Supplementary material for: The causal effects of circulating cytokines on sepsis: a Mendelian randomization study
Source: PeerJ journal article supplement (doi:10.7717/peerj.16860), 2024-02-01

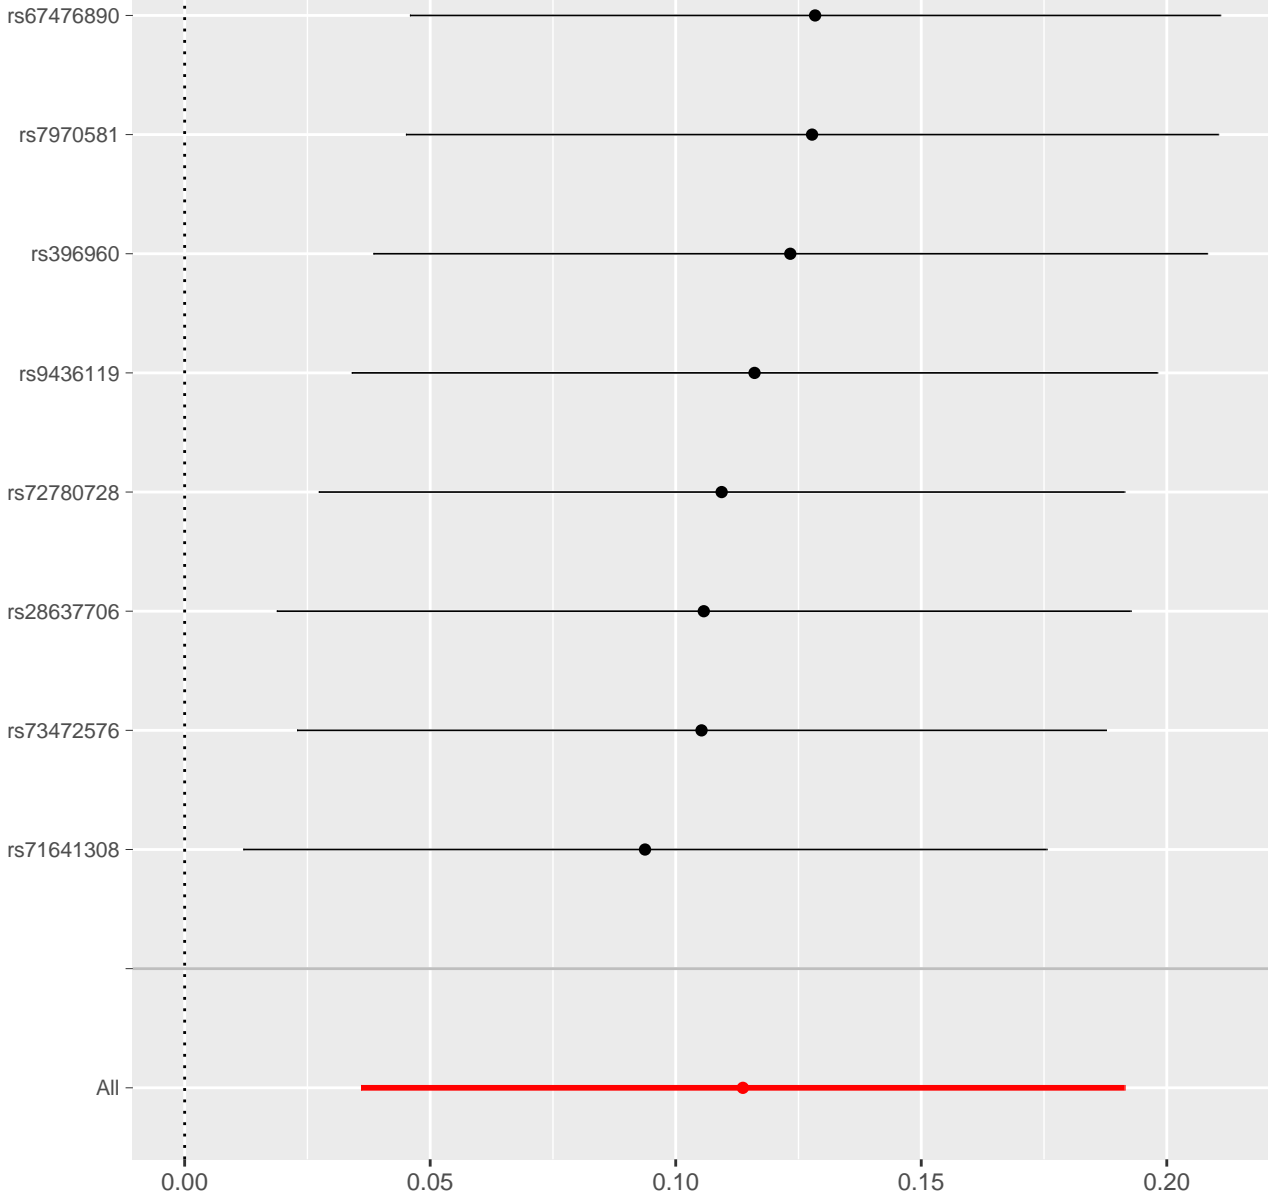

Supplement: FigureS2leave.pdf [file FigureS2leave.pdf]
