# Supplementary material for: The causal effects of circulating cytokines on sepsis: a Mendelian randomization study
Source: PeerJ journal article supplement (doi:10.7717/peerj.16860), 2024-02-01

### MR Test

- Inverse variance weighted
- MR Egger
- Simple mode
- Weighted median
- Weighted mode

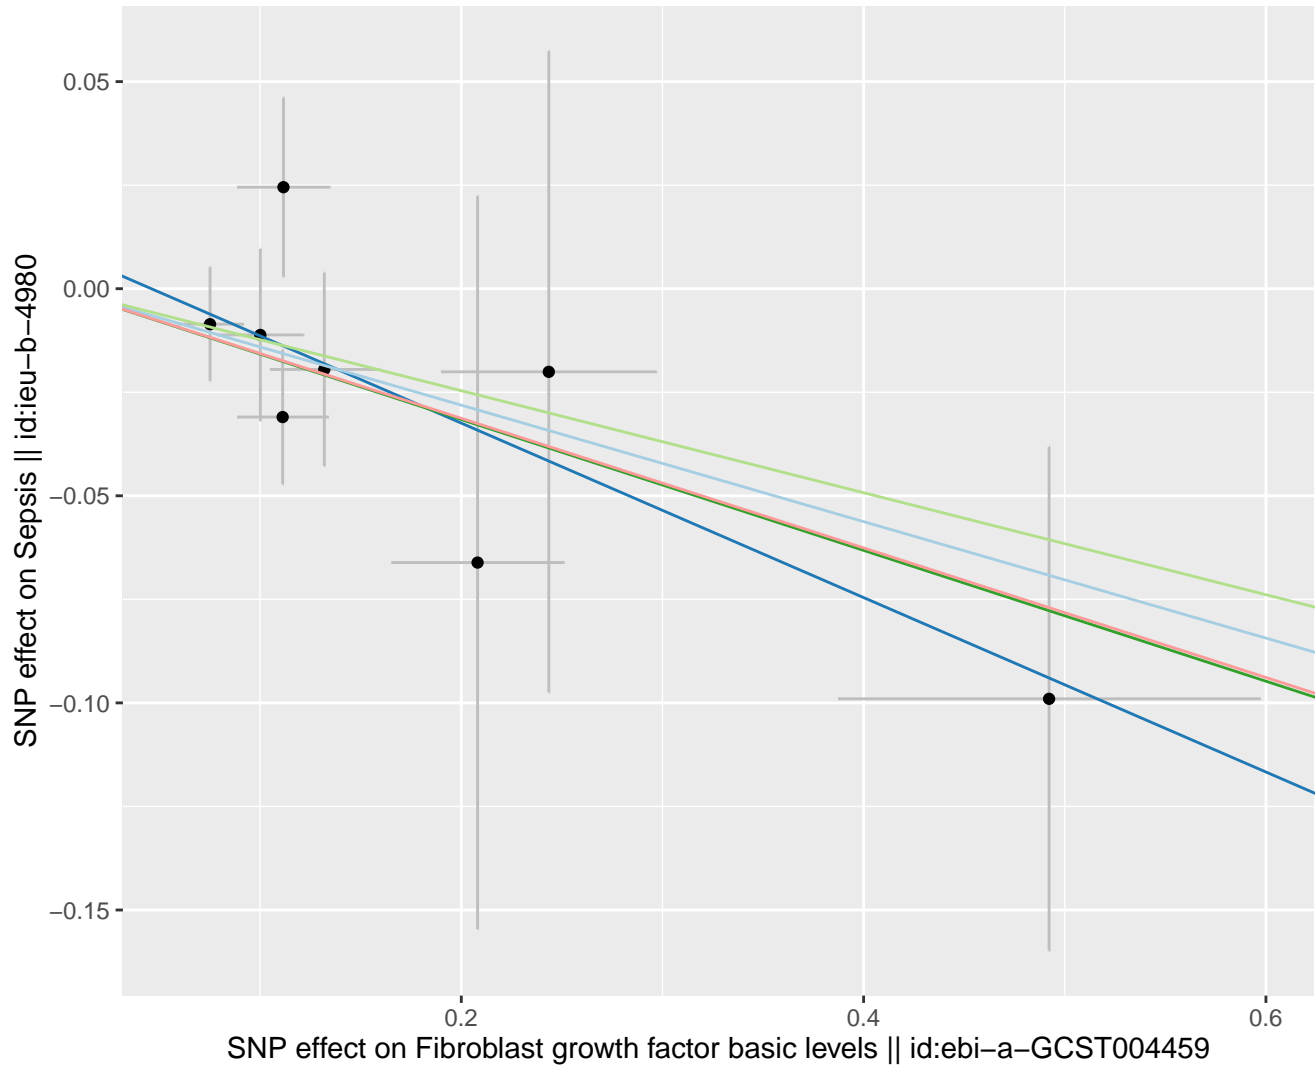

Supplement: FigureS5ScatterFibroblast.pdf [file FigureS5ScatterFibroblast.pdf]
