# Supplementary material for: The causal effects of circulating cytokines on sepsis: a Mendelian randomization study
Source: PeerJ journal article supplement (doi:10.7717/peerj.16860), 2024-02-01
Supplement: FigureS6LeaveFibroblast.pdf [file FigureS6LeaveFibroblast.pdf]

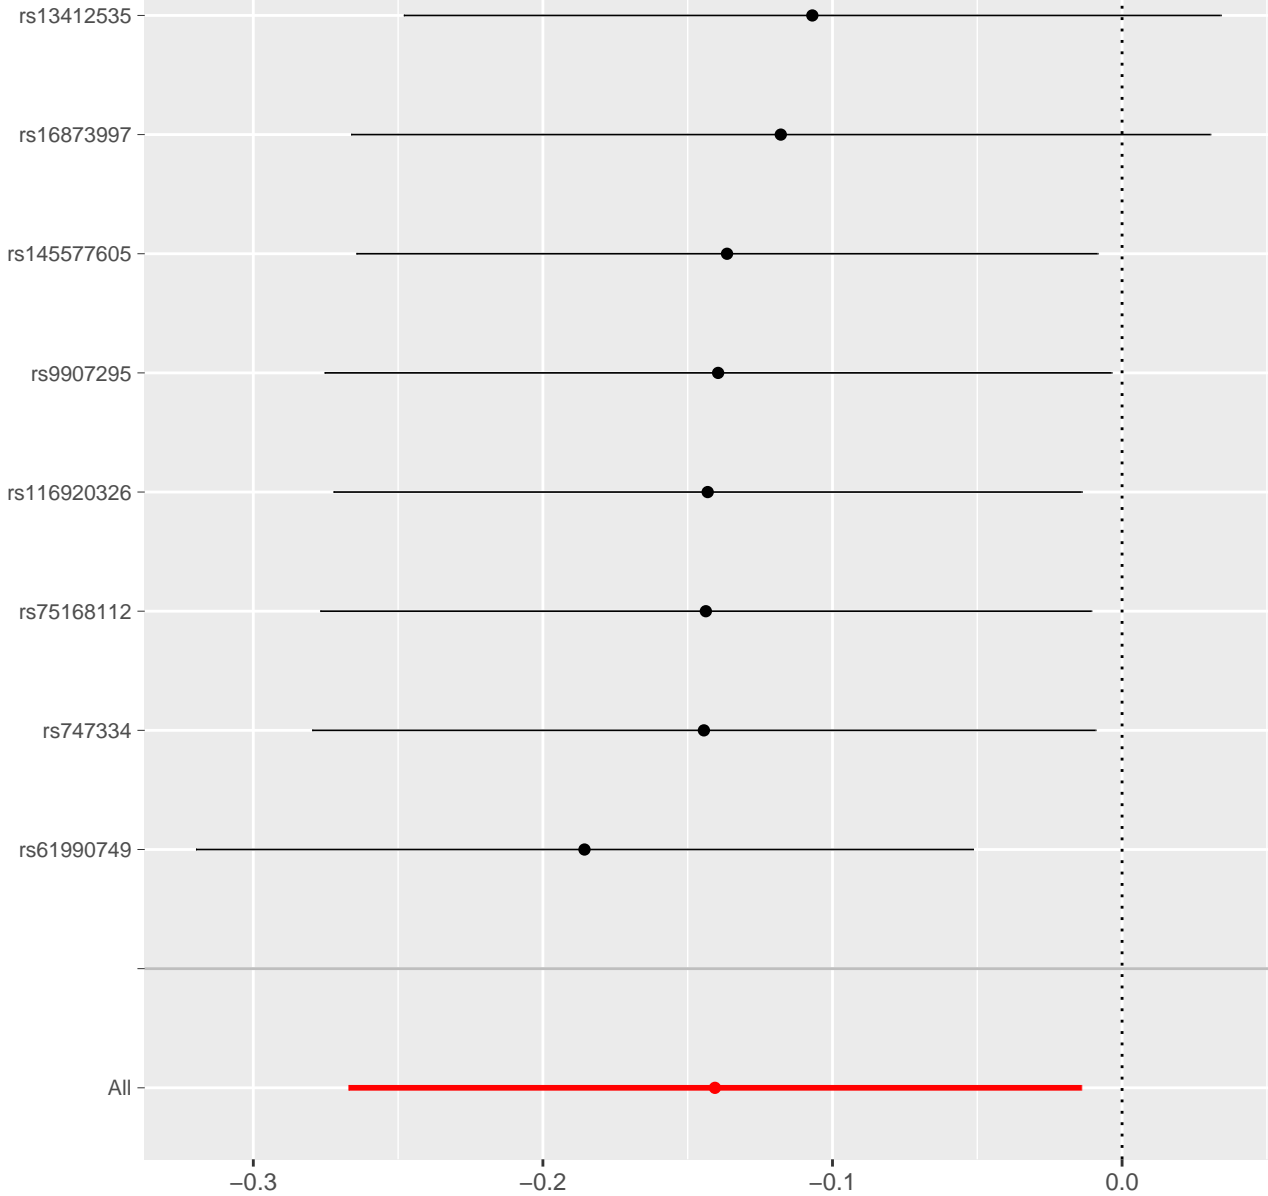

MR leave-one-out sensitivity analysis for 'Fibroblast growth factor basic levels || id:ebi-a-GCST004459' on 'Sepsis || id:ieu-b-4980'
