# Supplementary material for: The causal effects of circulating cytokines on sepsis: a Mendelian randomization study
Source: PeerJ. 2024 Feb 1;12:e16860. doi: 10.7717/peerj.16860 (PMC10838533; doi:10.7717/peerj.16860)
Supplement: Supplemental Information 7 [file peerj-12-16860-s007.xlsx]

## Sheet: Sheet1
Supplementaty Table s1. Data source and description
Phenotypes	GWAS ID	Year	Consortium	No. Case	No. Control	No. SNPs	PMID
Sepsis	ieu-b-4980	2021	UK Biobank	11643	486484	12243539	NA
CTACK levels	ebi-a-GCST004420	2016	NA	3631	NA	9568408	27989323
beta-nerve growth factor levels	ebi-a-GCST004421	2016	NA	3531	NA	9537863	27989323
Vascular endothelial growth factor levels	ebi-a-GCST004422	2016	NA	7118	NA	9784803	27989323
Macrophage Migration Inhibitory Factor levels	ebi-a-GCST004423	2016	NA	3494	NA	9537573	27989323
TRAIL levels	ebi-a-GCST004424	2016	NA	8186	NA	9698525	27989323
Tumor necrosis factor beta levels	ebi-a-GCST004425	2016	NA	1559	NA	6304298	27989323
Tumor necrosis factor alpha levels	ebi-a-GCST004426	2016	NA	3454	NA	9500449	27989323
Stromal-cell-derived factor 1 alpha levels	ebi-a-GCST004427	2016	NA	5998	NA	9736366	27989323
Stem cell growth factor beta levels	ebi-a-GCST004428	2016	NA	3682	NA	9574890	27989323
Stem cell factor levels	ebi-a-GCST004429	2016	NA	8290	NA	9796683	27989323
Interleukin-16 levels	ebi-a-GCST004430	2016	NA	3483	NA	9551485	27989323
RANTES levels	ebi-a-GCST004431	2016	NA	3421	NA	9523827	27989323
Platelet-derived growth factor BB levels	ebi-a-GCST004432	2016	NA	8293	NA	9800009	27989323
Macrophage inflammatory protein 1b levels	ebi-a-GCST004433	2016	NA	8243	NA	9802973	27989323
Macrophage inflammatory protein 1a levels	ebi-a-GCST004434	2016	NA	3522	NA	9519267	27989323
Monokine induced by gamma interferon levels	ebi-a-GCST004435	2016	NA	3685	NA	9579894	27989323
Macrophage colony stimulating factor levels	ebi-a-GCST004436	2016	NA	840	NA	9184521	27989323
Monocyte chemoattractant protein-3 levels	ebi-a-GCST004437	2016	NA	843	NA	7630881	27989323
Monocyte chemoattractant protein-1 levels	ebi-a-GCST004438	2016	NA	8293	NA	9801908	27989323
Interleukin-12p70 levels	ebi-a-GCST004439	2016	NA	8270	NA	9799886	27989323
Interferon gamma-induced protein 10 levels	ebi-a-GCST004440	2016	NA	3685	NA	9576881	27989323
Interleukin-18 levels	ebi-a-GCST004441	2016	NA	3636	NA	9785222	27989323
Interleukin-17 levels	ebi-a-GCST004442	2016	NA	7760	NA	9786653	27989323
Interleukin-13 levels	ebi-a-GCST004443	2016	NA	3557	NA	9539073	27989323
Interleukin-10 levels	ebi-a-GCST004444	2016	NA	7681	NA	9793415	27989323
Interleukin-8 levels	ebi-a-GCST004445	2016	NA	3526	NA	9517348	27989323
Interleukin-6 levels	ebi-a-GCST004446	2016	NA	8189	NA	9790590	27989323
Interleukin-1-receptor antagonist levels	ebi-a-GCST004447	2016	NA	3638	NA	9564741	27989323
Interleukin-1-beta levels	ebi-a-GCST004448	2016	NA	3309	NA	9983642	27989323
Hepatocyte growth factor levels	ebi-a-GCST004449	2016	NA	8292	NA	9802538	27989323
Interleukin-9 levels	ebi-a-GCST004450	2016	NA	3634	NA	9567876	27989323
Interleukin-7 levels	ebi-a-GCST004451	2016	NA	3409	NA	9692306	27989323
Interleukin-5 levels	ebi-a-GCST004452	2016	NA	3364	NA	9450731	27989323
Interleukin-4 levels	ebi-a-GCST004453	2016	NA	8124	NA	9786064	27989323
Interleukin-2 receptor antagonist levels	ebi-a-GCST004454	2016	NA	3677	NA	9583519	27989323
Interleukin-2 levels	ebi-a-GCST004455	2016	NA	3475	NA	9512914	27989323
Interferon gamma levels	ebi-a-GCST004456	2016	NA	7701	NA	9785363	27989323
Growth-regulated protein alpha levels	ebi-a-GCST004457	2016	NA	3505	NA	9528505	27989323
Granulocyte-colony stimulating factor levels	ebi-a-GCST004458	2016	NA	7904	NA	9788961	27989323
Fibroblast growth factor basic levels	ebi-a-GCST004459	2016	NA	7565	NA	9790946	27989323
Eotaxin levels	ebi-a-GCST004460	2016	NA	8153	NA	9793404	27989323
