# Supplementary material for: The causal effects of circulating cytokines on sepsis: a Mendelian randomization study
Source: PeerJ. 2024 Feb 1;12:e16860. doi: 10.7717/peerj.16860 (PMC10838533; doi:10.7717/peerj.16860)
Supplement: Supplemental Information 8 [file peerj-12-16860-s008.xlsx]

## Sheet: Table s1
Table S2. Characteristics of the genetic instrument variables for the cytokines at the genome-wide significance level
	SNP	chr	pos	A1	A2	Beta	SE	P	EAF	F-statistic
CTACK levels	rs113436108	3	60003909	C	G	-0.5249	0.1119	3.42397e-06	0.01162	22.0036
	rs115348265	2	26040878	T	A	-0.3199	0.0675	2.14398e-06	0.0156226	22.4606
	rs116303454	3	27294655	A	G	0.383	0.0816	3.27198e-06	0.02572	22.0301
	rs135555	22	46550315	G	C	0.186	0.0268	4.59621e-12	0.855867	48.1677
	rs145902143	12	20944907	G	A	0.2838	0.0581	1.02799e-06	0.0259948	23.8601
	rs2070074	9	34649442	G	A	-0.4467	0.0374	1.78484e-32	0.0507117	142.656
	rs2731674	5	176839890	G	T	0.1333	0.0267	5.63495e-07	0.515864	24.9251
	rs3766110	1	169515183	C	A	0.1287	0.0278	3.85496e-06	0.212762	21.4322
	rs55764737	15	61323414	C	T	-0.5313	0.0972	4.61796e-08	0.01498	29.8777
	rs57338032	15	78798939	G	A	-0.1583	0.0317	6.22802e-07	0.145516	24.9369
	rs7333764	13	34208801	T	C	0.2773	0.0593	2.85397e-06	0.03779	21.8671
	rs76395525	15	79741391	A	G	0.5277	0.1083	9.54905e-07	0.01023	23.742
beta-nerve growth factor levels	rs28637706	19	34285368	T	G	-0.1589	0.0263	1.42298e-09	0.244174	36.5037
	rs396960	6	32191581	A	T	-0.1601	0.0346	3.59402e-06	0.318351	21.4107
	rs67476890	15	62791494	T	C	0.1769	0.0379	3.12702e-06	0.1108	21.786
	rs71641308	1	78086718	T	C	0.2043	0.0432	2.30102e-06	0.0412998	22.365
	rs72780728	10	17603701	A	G	0.1883	0.0403	2.99302e-06	0.085395	21.8319
	rs73472576	18	72124182	C	T	0.1181	0.0252	2.689e-06	0.569413	21.9634
	rs7970581	12	113265248	G	T	-0.138	0.0282	9.27107e-07	0.807559	23.9475
	rs9436119	1	150467753	A	G	-0.1121	0.0246	3.90598e-06	0.33563	20.7654
Vascular endothelial growth factor levels	rs10153304	17	7721931	A	G	0.1547	0.0325	1.94299e-06	0.08515	22.6576
	rs10761731	10	65027610	T	A	0.1187	0.0174	1.006e-11	0.433438	46.5375
	rs10934631	3	122697600	C	T	0.1151	0.0245	2.46899e-06	0.1169	22.0708
	rs10967186	9	2617099	C	T	-0.0898	0.017	1.232e-07	0.225152	27.9033
	rs13209117	6	44151765	A	G	0.1302	0.0201	5.28202e-11	0.157115	41.9595
	rs143479231	3	193110794	A	G	-0.2598	0.0491	1.895e-07	0.04215	27.9972
	rs4082730	15	90523558	A	G	0.2522	0.0534	2.63797e-06	0.02616	22.3053
	rs6921438	6	43925607	A	G	-0.49	0.0175	2.0893e-171	0.448543	784
	rs7030781	9	2686273	T	A	-0.1368	0.0173	2.56507e-15	0.45489	62.5288
	rs73418461	10	120222996	A	G	-0.2492	0.0521	1.67498e-06	0.0377421	22.8781
	rs8045833	16	88575439	A	G	0.108	0.0211	2.828e-07	0.335952	26.1989
	rs9472183	6	43940202	G	A	0.1282	0.017	5.18561e-14	0.311351	56.8693
Macrophage Migration Inhibitory Factor levels	rs113218956	22	25224834	A	G	-0.8948	0.1879	2.26199e-06	0.003912	22.6777
	rs11551183	16	8988692	G	C	-0.3715	0.0797	2.52901e-06	0.02195	21.7271
	rs118055855	11	29888572	C	T	-0.6907	0.15	4.12601e-06	0.028704	21.203
	rs12594190	15	25036455	G	A	-0.1355	0.0267	3.70203e-07	0.29222	25.7547
	rs13142904	4	54318414	T	C	-0.223	0.0425	2.556e-07	0.0382709	27.5316
	rs141009259	2	207976283	C	T	0.6178	0.1322	2.47201e-06	0.0117	21.839
	rs2330634	22	24250795	G	C	-0.1556	0.0249	4.52501e-10	0.536764	39.05
	rs28994873	6	30671588	T	A	-0.1337	0.026	9.66296e-07	0.00392188	26.4433
	rs78098071	5	163309739	C	T	0.4867	0.0918	1.77902e-07	0.01683	28.1085
TRAIL levels	rs10075741	5	91387738	G	C	-0.0881	0.0189	3.33503e-06	0.106897	21.7284
	rs11618126	13	50826239	G	A	-0.8908	0.1914	1.45999e-06	0.001935	21.6609
	rs11657269	17	6319784	G	A	-0.1188	0.026	4.78101e-06	0.26855	20.8779
	rs11699445	20	15750790	G	T	-0.0746	0.0161	3.26798e-06	0.563815	21.4697
	rs13185784	5	179694068	A	G	0.0846	0.0183	3.89798e-06	0.172596	21.3717
	rs13278062	8	23082971	T	G	0.0801	0.0157	3.57001e-07	0.434042	26.0295
	rs138987090	18	30366247	G	A	0.7497	0.0752	4.50194e-23	0.01428	99.3892
	rs146783010	11	89260213	G	A	0.6016	0.135	4.83203e-06	0.004839	19.8586
	rs193112415	18	28835120	C	T	1.0421	0.0623	2.14585e-62	0.01947	279.797
	rs28431810	4	164254820	G	C	0.1195	0.0253	2.52098e-06	0.204388	22.3098
	rs57396456	18	27945877	C	T	0.5626	0.0518	1.25199e-27	0.11307	117.961
	rs62093514	18	29230977	T	C	1.0618	0.0552	6.85962e-82	0.02306	370.005
	rs73039026	3	172160481	C	A	0.2999	0.0635	2.024e-06	0.02005	22.3052
	rs747324	14	74689644	C	T	0.0855	0.0178	1.60702e-06	0.469568	23.0724
	rs74778900	18	28086266	T	C	0.5906	0.0532	2.58583e-28	0.01323	123.243
	rs75928541	4	16401771	A	G	0.275	0.0593	4.24004e-06	0.02242	21.5058
	rs79287178	3	172294500	A	G	-0.4317	0.0421	9.11801e-25	0.04155	105.148
Tumor necrosis factor beta levels	rs10925040	1	247622698	T	C	0.1755	0.0373	2.666e-06	0.41689	22.1379
	rs75240021	8	121562260	C	G	0.3705	0.0772	1.61102e-06	0.07856	23.0325
	rs753274	19	14436462	T	C	-0.1736	0.0371	2.773e-06	0.675484	21.8953
	rs7629875	3	174385622	G	A	-0.3766	0.0774	1.373e-06	0.126397	23.6744
	rs78296352	1	22821844	T	G	1.2215	0.1366	4.75773e-21	0.01401	79.9623
Tumor necrosis factor alpha levels	rs10834997	11	26526948	A	G	-0.1247	0.0258	1.32902e-06	0.783605	23.3611
	rs111332265	5	150393107	G	A	0.3766	0.0754	6.62995e-07	0.03516	24.947
	rs115669577	4	124361448	A	G	0.9889	0.1995	8.284e-07	0.004	24.5708
	rs79105320	8	18817360	A	G	0.5605	0.1179	3.59203e-06	0.01144	22.6008
	rs8121916	20	12401325	A	C	0.1306	0.0278	2.72301e-06	0.242877	22.0697
Stromal-cell-derived factor 1 alpha levels	rs112346514	19	12407988	T	C	-0.3314	0.0711	2.37301e-06	0.0385	21.7253
	rs116924815	19	51230733	T	C	0.6079	0.0738	1.74381e-16	0.0282	67.8503
	rs117716477	12	104240958	A	C	0.8384	0.0841	1.34215e-23	0.01689	99.3826
	rs12480722	20	20228904	C	T	-0.1624	0.0355	4.72204e-06	0.0751353	20.9274
	rs13287050	9	78810117	T	A	0.1242	0.0264	2.20201e-06	0.2825	22.1327
	rs139413256	7	145879644	A	G	-0.5377	0.1084	7.04304e-07	0.01625	24.6049
	rs143829871	3	47597245	C	T	0.1902	0.04	1.89701e-06	0.09402	22.61
	rs151194174	7	20995778	A	G	0.4635	0.0942	1.12899e-06	0.0298707	24.2102
	rs17876031	5	176831119	G	A	0.1514	0.0255	2.24999e-09	0.465091	35.251
	rs264162	18	10944026	G	A	-0.1097	0.0234	2.68497e-06	0.455481	21.9777
	rs34911860	1	80350715	A	G	-0.3675	0.0789	3.23698e-06	0.01759	21.6951
	rs4656185	1	169476326	A	G	0.205	0.0256	1.16011e-15	0.308459	64.1251
	rs4737732	8	66333628	G	A	0.1147	0.0252	4.67595e-06	0.536093	20.7169
	rs7762066	6	95177967	C	T	-0.1389	0.0299	3.49502e-06	0.194333	21.5805
	rs78217154	8	101554072	C	T	-0.3997	0.0864	3.77303e-06	0.0199	21.4013
Stem cell growth factor beta levels	rs112346514	19	12407988	T	C	-0.3314	0.0711	2.37301e-06	0.0385	21.7253
	rs116924815	19	51230733	T	C	0.6079	0.0738	1.74381e-16	0.0282	67.8503
	rs117716477	12	104240958	A	C	0.8384	0.0841	1.34215e-23	0.01689	99.3826
	rs12480722	20	20228904	C	T	-0.1624	0.0355	4.72204e-06	0.0751353	20.9274
	rs13287050	9	78810117	T	A	0.1242	0.0264	2.20201e-06	0.2825	22.1327
	rs139413256	7	145879644	A	G	-0.5377	0.1084	7.04304e-07	0.01625	24.6049
	rs143829871	3	47597245	C	T	0.1902	0.04	1.89701e-06	0.09402	22.61
	rs151194174	7	20995778	A	G	0.4635	0.0942	1.12899e-06	0.0298707	24.2102
	rs17876031	5	176831119	G	A	0.1514	0.0255	2.24999e-09	0.465091	35.251
	rs264162	18	10944026	G	A	-0.1097	0.0234	2.68497e-06	0.455481	21.9777
	rs34911860	1	80350715	A	G	-0.3675	0.0789	3.23698e-06	0.01759	21.6951
	rs4656185	1	169476326	A	G	0.205	0.0256	1.16011e-15	0.308459	64.1251
	rs4737732	8	66333628	G	A	0.1147	0.0252	4.67595e-06	0.536093	20.7169
	rs7762066	6	95177967	C	T	-0.1389	0.0299	3.49502e-06	0.194333	21.5805
	rs78217154	8	101554072	C	T	-0.3997	0.0864	3.77303e-06	0.0199	21.4013
Stem cell factor levels	rs113127926	14	98437511	A	C	0.1982	0.042	2.27002e-06	0.03959	22.2694
	rs13412535	2	224874874	A	G	-0.1067	0.0213	6.03893e-07	0.204126	25.094
	rs1557570	1	169507844	T	G	0.1186	0.017	2.73905e-12	0.311468	48.6711
	rs1568119	8	33243197	T	C	-0.5906	0.1129	1.24e-07	0.0946341	27.3652
	rs1942355	18	69361739	T	C	-0.0716	0.0157	4.69602e-06	0.543897	20.7982
	rs4841899	9	137424412	C	T	0.1004	0.0178	1.77799e-08	0.315883	31.8147
	rs635634	9	136155000	T	C	-0.1032	0.0191	6.74295e-08	0.243816	29.1939
	rs7039247	9	1262702	G	C	-0.0806	0.0168	1.595e-06	0.325337	23.0171
	rs72678285	14	54350151	T	A	-0.1092	0.0232	2.25201e-06	0.14926	22.1549
	rs78666213	4	180138649	G	T	0.2744	0.0576	2.59298e-06	0.02096	22.6946
	rs80271436	9	135897770	A	G	-0.237	0.0485	9.95291e-07	0.0262	23.8788
Interleukin-16 levels	rs115981497	9	120516364	A	T	-0.8306	0.1681	3.58996e-06	0.005737	24.4145
	rs117217798	17	31483233	T	C	-0.2036	0.0444	4.15298e-06	0.0394197	21.0276
	rs117916513	11	121264274	A	G	-0.502	0.0986	3.78504e-07	0.0798877	25.9211
	rs1255143	10	130052200	T	C	0.1306	0.0242	7.09594e-08	0.710079	29.1243
	rs12765671	10	106684169	A	G	-0.6023	0.1318	4.83805e-06	0.00435652	20.8831
	rs144691581	15	96953325	A	G	0.4882	0.0967	4.20001e-07	0.02195	25.4884
	rs1801020	5	176836532	G	A	-0.1733	0.0272	4.53002e-10	0.515223	40.5938
	rs4253283	4	187165211	C	T	-0.146	0.0262	1.74598e-08	0.786186	31.053
	rs4513633	4	113570639	A	C	-0.2239	0.0453	7.44201e-07	0.737638	24.4293
	rs4778636	15	81591639	A	G	-0.7272	0.0633	1.1079e-30	0.124115	131.978
	rs9706053	12	66376310	T	C	0.4582	0.0932	7.01197e-07	0.08369	24.1701
RANTES levels	rs112072646	2	53444393	A	G	0.4286	0.0862	6.48396e-07	0.018	24.7224
	rs147509526	19	15776330	T	C	-0.358	0.0717	6.92899e-07	0.03234	24.9303
	rs2702950	17	34253191	C	G	-0.1658	0.0321	2.39999e-07	0.268386	26.6784
	rs4940620	18	61971111	G	A	0.2494	0.054	3.53704e-06	0.0565661	21.3307
	rs62438851	6	145230309	G	A	0.1957	0.0414	2.32798e-06	0.0612279	22.345
	rs7000423	8	111053649	T	C	-0.1318	0.0253	1.82301e-07	0.651278	27.1387
	rs7170339	15	36752337	G	C	0.4203	0.0912	4.41296e-06	0.926554	21.2388
	rs72793342	16	30548352	A	G	-0.1487	0.0308	1.48201e-06	0.165215	23.3088
	rs74472919	13	82200650	T	C	0.3313	0.0605	3.96899e-08	0.03858	29.9869
	rs75613039	11	129576583	T	C	0.37	0.081	4.81005e-06	0.02761	20.8657
	rs818452	6	152915796	T	C	0.2381	0.0505	2.362e-06	0.100927	22.2298
Platelet-derived growth factor BB levels	rs11247305	15	102100210	G	C	0.1692	0.0364	1.895e-06	0.166318	21.6072
	rs116445074	5	51534600	T	G	0.2931	0.0587	3.111e-07	0.0107444	24.9319
	rs11766649	7	144839247	G	A	-0.0908	0.0196	3.53102e-06	0.196805	21.4615
	rs11916118	3	116912189	G	A	-0.0889	0.0194	4.93197e-06	0.225791	20.9991
	rs12289510	11	124947051	G	A	0.078	0.0158	7.69396e-07	0.347023	24.3711
	rs13412535	2	224874874	A	G	0.3352	0.0214	2.46093e-55	0.204126	245.347
	rs2324229	6	83918131	C	T	-0.0894	0.0161	3.48401e-08	0.304165	30.8335
	rs35859699	4	112184751	A	G	-0.3952	0.0842	2.066e-06	0.01144	22.0298
	rs4965869	15	101990320	T	C	0.184	0.0181	5.66239e-24	0.258359	103.342
	rs55680718	2	225166877	T	C	-0.1383	0.0246	1.85802e-08	0.12	31.6063
	rs72777070	2	9798877	G	T	0.1069	0.02	8.98401e-08	0.18221	28.569
	rs73162807	3	146474790	A	C	-0.2391	0.0499	1.735e-06	0.02441	22.9593
	rs9936075	16	7321909	G	A	0.0782	0.0164	1.76202e-06	0.267949	22.7366
	rs9941733	20	374061	G	A	-0.1161	0.0228	3.30598e-07	0.145743	25.9295
Macrophage inflammatory protein 1b levels	rs11130043	3	45111239	A	G	-0.0731	0.0157	3.21603e-06	0.617711	21.6788
	rs113010081	3	46457412	C	T	0.5954	0.0236	3.84592e-140	0.1289	636.493
	rs113877493	17	34812273	T	C	-0.6124	0.0218	1.62181e-173	0.1636	789.146
	rs116237296	1	87045516	A	G	0.5437	0.1115	7.23203e-07	0.005147	23.7777
	rs117453826	17	35132809	G	A	0.5774	0.0593	5.06524e-22	0.02259	94.8078
	rs141102180	17	34436204	T	G	0.3225	0.0393	1.07895e-16	0.04099	67.3402
	rs17138331	7	7866368	G	A	0.1391	0.0295	2.26001e-06	0.152518	22.2336
	rs17641689	17	35024819	G	A	0.2448	0.0293	1.28292e-16	0.1114	69.8052
	rs2079664	17	33007955	G	A	-0.0995	0.0176	1.50699e-08	0.296332	31.961
	rs281749	8	108638645	C	T	-0.0799	0.0171	3.17402e-06	0.692922	21.8324
	rs34437725	17	33826785	C	T	0.2633	0.0483	7.67397e-08	0.0447594	29.7172
	rs4609608	11	62926925	C	G	-0.0936	0.0202	3.61801e-06	0.2248	21.4708
	rs72791296	5	120950050	T	C	0.2369	0.0466	3.78303e-07	0.03416	25.8439
	rs72799710	5	123161665	T	C	-0.1014	0.0218	3.20501e-06	0.148021	21.6353
	rs74810984	10	129674466	C	T	-0.2206	0.0474	1.95898e-06	0.02648	21.6598
	rs76356863	3	46072029	T	A	0.3494	0.0667	1.67201e-07	0.01202	27.4406
	rs76582507	9	37510072	A	G	0.3175	0.0677	3.26002e-06	0.008566	21.9943
	rs76583883	21	47356359	T	G	-0.2317	0.0511	4.98999e-06	0.03545	20.5594
	rs76776296	7	115128487	G	A	-0.2997	0.0598	5.54702e-07	0.02082	25.1172
	rs79068918	3	45344715	C	G	0.2752	0.0271	3.20184e-24	0.09383	103.124
Macrophage inflammatory protein 1a levels	rs10835056	11	26697017	G	T	-0.1194	0.0254	2.60399e-06	0.727061	22.0974
	rs12690897	7	85346177	A	G	0.1248	0.0262	2.10698e-06	0.629509	22.6896
	rs184154340	11	80502036	A	G	0.331	0.0693	1.86402e-06	0.03776	22.8134
	rs34771762	2	201412655	G	A	-0.249	0.0523	2.133e-06	0.0319519	22.6671
	rs57786342	14	69260028	A	G	0.1314	0.0285	4.05499e-06	0.0123374	21.257
	rs60198979	22	43646704	A	G	-0.2146	0.0458	2.61499e-06	0.0873219	21.9547
	rs7232268	18	67768914	G	A	-0.2821	0.0599	2.553e-06	0.9598	22.1795
Monokine induced by gamma interferon levels	rs111607343	19	897855	A	G	-0.521	0.1119	2.83198e-06	0.01409	21.6778
	rs11177248	12	68875886	A	G	0.3073	0.067	4.45102e-06	0.0398	21.0366
	rs112337562	14	93131570	G	T	0.37	0.0796	2.97797e-06	0.02591	21.6061
	rs112861654	21	43599172	G	A	0.2765	0.0529	1.80501e-07	0.06026	27.3199
	rs117831247	10	68501839	T	C	-0.8334	0.1754	2.15899e-06	0.004746	22.576
	rs139010077	3	170336148	T	C	0.4322	0.095	3.54503e-06	0.01705	20.6977
	rs1796086	7	70648715	C	T	0.2096	0.0403	2.229e-07	0.0607313	27.0503
	rs41272086	6	161008646	A	G	-0.2226	0.0415	7.42592e-08	0.1002	28.7709
	rs55876513	4	76883698	G	T	-0.166	0.0255	8.2319e-11	0.320148	42.3775
	rs5752128	22	25718623	C	T	0.1685	0.0369	4.343e-06	0.122	20.852
	rs62562991	9	98736059	A	G	0.6236	0.126	8.39595e-07	0.01462	24.4946
	rs6679677	1	114303808	A	C	0.162	0.0329	8.86196e-07	0.1463	24.2459
	rs75880256	9	30872219	G	C	0.2703	0.0586	3.89099e-06	0.04621	21.2763
	rs77086208	14	70619491	T	C	0.3226	0.0698	3.83098e-06	0.02784	21.3608
	rs816960	13	108522521	T	C	-0.1224	0.0244	5.00795e-07	0.434937	25.1642
	rs902851	4	162997578	T	A	-0.8205	0.1884	4.68101e-06	0.944873	18.9669
Macrophage colony stimulating factor levels	rs116274860	3	148392817	G	T	-0.819	0.1741	2.74e-06	0.01276	22.1294
	rs117867915	18	42210043	C	T	-0.5272	0.1098	1.61399e-06	0.02005	23.054
	rs12962919	18	75778756	T	C	0.3052	0.0662	4.64997e-06	0.098887	21.2546
	rs145778765	20	3182002	T	C	-0.7993	0.1689	2.20298e-06	0.01966	22.3955
	rs4269021	22	47673948	G	C	0.235	0.0507	3.65797e-06	0.0478248	21.4842
	rs56367447	8	3871527	T	C	-0.4967	0.0883	1.721e-08	0.03325	31.6422
	rs62294910	3	182198339	A	G	0.3431	0.0691	6.81993e-07	0.06237	24.6539
	rs78296352	1	22821844	T	G	0.527	0.1112	1.04701e-06	0.01401	22.4601
	rs9387100	6	113102954	C	T	0.1352	0.0292	4.07296e-06	0.762282	21.4382
Monocyte chemoattractant protein-3 levels	rs10892381	11	119400817	T	C	0.2412	0.0476	3.55803e-07	0.554974	25.6768
	rs28394764	4	111054252	T	A	-0.6012	0.1282	3.01203e-06	0.0249824	21.9919
	rs62492260	8	10476528	T	G	-0.2788	0.058	1.53501e-06	0.160779	23.1063
	rs73669117	8	27835190	G	A	0.6238	0.131	2.561e-06	0.02354	22.675
Monocyte chemoattractant protein-1 levels	rs10145849	14	82941991	A	G	-0.0755	0.0162	3.40902e-06	0.587011	21.7202
	rs10744620	12	3739094	C	T	-0.0788	0.0161	9.91197e-07	0.602626	23.9552
	rs111995966	2	109174969	G	T	-0.1452	0.031	2.52703e-06	0.07773	21.9386
	rs112313229	3	46364860	A	G	-0.1646	0.0313	1.431e-07	0.07203	27.6548
	rs12073356	1	208007848	A	G	-0.1426	0.0311	4.16505e-06	0.0508995	21.0241
	rs12075	1	159175354	A	G	0.2185	0.0155	1.43516e-44	0.285925	198.719
	rs12493471	3	45951678	C	T	-0.1163	0.0162	6.80769e-13	0.844875	51.5382
	rs146522229	19	47798480	T	C	-0.5976	0.1177	3.56098e-07	0.004199	25.7791
	rs2228467	3	42906116	C	T	0.2637	0.0291	9.19179e-20	0.07578	82.1172
	rs2712431	3	128316890	A	C	-0.0787	0.0172	4.75499e-06	0.800444	20.9359
	rs56212190	1	42168539	T	C	0.181	0.0373	9.84691e-07	0.04874	23.5472
	rs62243917	3	46289206	T	A	0.3171	0.0331	7.94328e-22	0.177256	91.7776
	rs7197349	16	78687219	G	A	-0.0968	0.0206	2.62198e-06	0.14772	22.0809
	rs7517040	1	158859133	G	A	0.0987	0.0191	2.43501e-07	0.97546	26.7035
	rs9317045	13	59630038	C	A	-0.1134	0.0236	1.51702e-06	0.237015	23.0888
Interleukin-12p70 levels	rs10761731	10	65027610	T	A	0.1001	0.0162	6.22802e-10	0.433438	38.1802
	rs13209117	6	44151765	A	G	0.1002	0.0186	5.56698e-08	0.157115	29.0208
	rs17229494	21	38928100	G	A	0.1172	0.0257	4.93094e-06	0.1107	20.7964
	rs200751	20	15599501	C	G	-0.0986	0.0214	3.97997e-06	0.0827669	21.2288
	rs2375980	9	2692622	G	C	-0.0937	0.0159	4.55198e-09	0.468252	34.7284
	rs282258	2	224914800	C	T	-0.073	0.0156	3.209e-06	0.407479	21.8976
	rs41282644	6	43753722	A	G	0.1473	0.0304	1.04501e-06	0.08301	23.4779
	rs4349809	6	43924830	G	T	-0.3777	0.0159	2.55859e-124	0.407982	564.287
	rs6993770	8	106581528	T	A	-0.0918	0.0189	1.118e-06	0.313791	23.5918
	rs71361173	18	73712405	G	T	-0.111	0.0239	3.05999e-06	0.0634686	21.57
	rs72831623	17	45722293	A	G	0.1913	0.037	2.41602e-07	0.06778	26.7317
	rs782107	12	58833530	A	G	0.075	0.0156	1.60199e-06	0.611468	23.1139
	rs79121401	11	78697129	C	T	-0.5548	0.1206	4.24199e-06	0.0230639	21.1631
	rs9472183	6	43940202	G	A	0.1019	0.0157	8.61192e-11	0.311351	42.1259
Interferon gamma-induced protein 10 levels	rs10809307	9	11045908	C	T	-0.1305	0.0282	3.64401e-06	0.7821	21.4152
	rs113831257	4	76159521	A	G	0.3592	0.0644	2.53303e-08	0.05083	31.1101
	rs11626201	14	36980700	A	C	0.1162	0.0245	1.92699e-06	0.565917	22.4947
	rs143799975	4	76807015	G	A	0.7984	0.1637	1.00201e-06	0.006914	23.7872
	rs188759467	5	73103247	A	T	0.4504	0.0964	3.21499e-06	0.037962	21.8294
	rs34383175	8	145584694	T	C	-0.3153	0.0657	1.51001e-06	0.03424	23.0312
	rs75970138	9	122576276	A	G	-0.485	0.104	1.52901e-06	0.0127	21.7479
	rs7645625	3	146574037	G	T	0.1086	0.0237	4.40697e-06	0.572366	20.9973
	rs79848609	15	87316165	C	A	-0.2603	0.0537	8.75205e-07	0.05036	23.4963
	rs8112909	19	46413408	A	G	-0.1426	0.0299	1.94102e-06	0.668178	22.7456
	rs9450351	6	86624320	C	T	0.2768	0.0489	1.47798e-08	0.298997	32.0416
Interleukin-18 levels	rs10414578	19	55146070	T	C	-0.1771	0.035	4.15901e-07	0.0687329	25.6036
	rs115267715	5	68535015	T	C	0.4508	0.08	1.72302e-08	0.02068	31.7532
	rs116383510	5	2545650	C	A	0.5426	0.1056	2.99502e-07	0.01592	26.4017
	rs11700536	21	44558687	T	C	0.1156	0.025	4.20901e-06	0.0693348	21.3814
	rs117266781	7	41301020	T	C	0.6841	0.1468	3.15e-06	0.008788	21.7164
	rs143370787	16	74951514	G	C	0.3116	0.066	2.35402e-06	0.04275	22.2898
	rs144841621	10	71681557	T	C	0.518	0.1141	3.81101e-06	0.01002	20.6105
	rs1656939	3	186432744	T	A	-0.1132	0.0236	1.56401e-06	0.440514	23.0075
	rs17229943	5	68682536	C	A	0.312	0.0463	1.61696e-11	0.1023	45.4096
	rs1852105	7	63725595	C	T	-0.3036	0.0661	4.31996e-06	0.925526	21.096
	rs1979967	15	79659613	T	C	0.1402	0.0286	9.45301e-07	0.387707	24.0306
	rs2729385	11	57262993	A	G	0.1231	0.0262	3.78504e-06	0.350073	22.0757
	rs385076	2	32489851	C	T	0.2432	0.0248	1.65882e-22	0.571215	96.1665
	rs4414903	4	178470496	C	G	-0.1161	0.025	3.30697e-06	0.45072	21.5667
	rs4482818	4	65928497	G	A	-0.1286	0.0244	1.45301e-07	0.332331	27.7781
	rs658805	6	70909073	A	G	0.1226	0.0244	4.94197e-07	0.251843	25.2465
	rs71478720	11	112009605	T	C	-0.2669	0.0276	3.70766e-22	0.108093	93.5145
	rs78623212	7	103307627	T	C	0.8705	0.1778	6.71104e-07	0.007951	23.9703
	rs78716465	20	40643726	A	G	0.3265	0.0682	1.63099e-06	0.03597	22.9191
Interleukin-17 levels	rs11640734	16	89795797	G	C	0.1187	0.0241	5.34995e-07	0.105615	24.2587
	rs117029961	10	37436581	A	G	0.4585	0.1015	4.93606e-06	0.0241669	20.4055
	rs117556572	13	105088917	T	C	-0.5102	0.1099	3.27997e-06	0.02437	21.5519
	rs148562661	6	145444116	G	C	-0.2128	0.0435	1.003e-06	0.04294	23.9312
	rs1530455	3	122854899	C	T	-0.108	0.0173	4.87405e-10	0.673668	38.9722
	rs17106604	14	78379156	T	C	0.1129	0.0225	6.37397e-07	0.183457	25.1781
	rs17282552	2	207973815	C	T	0.2001	0.0405	8.21297e-07	0.05226	24.4109
	rs187475560	4	161274563	T	C	-0.2434	0.052	3.287e-06	0.02869	21.9096
	rs62191444	20	373667	T	G	-0.1136	0.0247	4.21502e-06	0.247593	21.1526
	rs78296352	1	22821844	T	G	0.3027	0.0646	4.26599e-06	0.01401	21.9563
	rs78612928	4	29813914	C	T	-0.1037	0.0222	2.61903e-06	0.192818	21.8198
Interleukin-13 levels	rs117795020	9	90084152	A	G	-0.3522	0.0716	9.86211e-07	0.0296	24.1965
	rs12623722	2	23178683	A	G	-0.1185	0.0258	4.19199e-06	0.265288	21.0959
	rs139083458	5	26160518	T	C	0.9902	0.2107	2.81002e-06	0.003503	22.086
	rs142167313	6	44172097	C	T	0.313	0.0617	3.97997e-07	0.04206	25.7347
	rs147747784	19	55118193	C	G	0.3671	0.0768	1.48799e-06	0.05079	22.8479
	rs27949	5	58550823	T	C	-0.1168	0.0252	3.42799e-06	0.688663	21.4825
	rs6799107	3	127057018	C	T	0.1459	0.0301	1.245e-06	0.0813139	23.4951
	rs7073807	10	69153428	C	T	-0.1682	0.0356	2.374e-06	0.920791	22.323
	rs75383097	1	62468634	C	G	-0.536	0.1165	4.28499e-06	0.01542	21.1679
	rs75995699	6	5140856	A	G	0.3319	0.0698	2.64198e-06	0.03357	22.6102
	rs76339001	21	17511777	T	A	0.4313	0.0886	1.15199e-06	0.02917	23.6969
	rs9472168	6	43928985	G	A	-0.4244	0.0248	1.08094e-65	0.407719	292.851
Interleukin-10 levels	rs10457128	6	106017976	A	G	-0.0865	0.0172	5.23697e-07	0.40753	25.2915
	rs10493718	1	83062933	A	C	-0.11	0.0222	7.15995e-07	0.297867	24.5516
	rs11206302	1	54673943	T	C	-0.1189	0.0251	2.20201e-06	0.891672	22.4397
	rs2086656	4	60498473	T	C	-0.0789	0.0171	3.78303e-06	0.618538	21.2893
	rs2375980	9	2692622	G	C	-0.0824	0.0165	7.06708e-07	0.468252	24.9394
	rs282258	2	224914800	C	T	-0.0992	0.0162	1.00099e-09	0.407479	37.4967
	rs3025021	6	43749163	C	T	-0.0947	0.0195	1.46201e-06	0.758834	23.5847
	rs41282660	6	44197006	G	A	0.1194	0.0255	3.72297e-06	0.1349	21.9244
	rs4349809	6	43924830	G	T	-0.2853	0.0165	5.77165e-67	0.407982	298.976
	rs465757	20	15580283	A	G	0.084	0.0174	1.17301e-06	0.649704	23.3056
	rs7088799	10	65016174	G	T	0.0852	0.0167	3.22597e-07	0.433266	26.0283
Interleukin-8 levels	rs11634944	15	25183093	C	T	0.1214	0.0252	1.29e-06	0.400533	23.2079
	rs12075	1	159175354	A	G	0.12	0.0236	3.88302e-07	0.285925	25.8546
	rs141926526	7	32848640	C	A	0.6149	0.1308	2.56998e-06	0.00389799	22.1001
	rs2673604	8	133411607	A	C	-0.1266	0.0255	7.01698e-07	0.624731	24.6483
Interleukin-6 levels	rs10752777	1	234386907	A	T	0.1098	0.0236	3.24698e-06	0.422972	21.6462
	rs1333040	9	22083404	T	C	0.0738	0.0158	3.16804e-06	0.584701	21.8172
	rs13412535	2	224874874	A	G	-0.1164	0.0215	7.34294e-08	0.204126	29.3109
	rs1884910	20	55026741	G	C	-0.079	0.0169	3.26002e-06	0.490166	21.8515
	rs72831623	17	45722293	A	G	0.1973	0.0372	1.078e-07	0.06778	28.1299
	rs73273528	20	50431113	T	C	0.2672	0.0553	9.58098e-07	0.0329057	23.3465
	rs75101555	3	152716682	G	C	0.3667	0.0781	2.59597e-06	0.01035	22.0455
	rs76856708	16	80729043	C	T	-0.3289	0.07	2.61198e-06	0.01361	22.0766
Interleukin-1-receptor antagonist levels	rs1054402	9	119163509	C	T	-0.1311	0.027	1.13201e-06	0.752482	23.5764
	rs11627423	14	33200623	C	A	-0.1171	0.0247	2.115e-06	0.32667	22.476
	rs11869294	17	43857223	G	C	0.2274	0.0474	1.501e-06	0.132092	23.0157
	rs12121840	1	165541642	T	C	0.2692	0.0571	2.434e-06	0.05158	22.2268
	rs147747784	19	55118193	C	G	0.3651	0.0757	1.46201e-06	0.05079	23.2612
	rs2809154	13	84727524	T	C	-0.1786	0.0388	3.73999e-06	0.518826	21.1885
	rs61335305	15	66453074	A	C	0.4453	0.0908	1e-06	0.0184	24.051
	rs9623661	22	43093376	T	C	-0.1966	0.0426	3.86002e-06	0.08863	21.2984
Interleukin-1-beta levels	rs143319329	7	128139459	T	C	0.2801	0.0715	1.996e-06	0.100806	15.3467
	rs1942793	18	71104371	T	G	0.0717	0.0187	4.976e-06	0.532535	14.7013
	rs61335305	15	66453074	A	C	0.2966	0.0724	1.89601e-06	0.0184	16.7828
	rs62015704	16	7467907	G	A	-0.1082	0.0283	2.08699e-06	0.235876	14.6178
	rs9898641	17	57571033	C	T	0.2032	0.0454	3.59203e-06	0.685263	20.0325
Hepatocyte growth factor levels	rs11060254	12	129815569	A	G	-0.08	0.0167	1.58402e-06	0.290133	22.9481
	rs150322232	7	7930374	G	A	-0.2104	0.0463	4.89001e-06	0.03918	20.6504
	rs1698249	14	84356186	C	A	0.1698	0.0372	4.08799e-06	0.04629	20.8348
	rs2003620	7	134479484	T	C	0.2279	0.0489	2.831e-06	0.0220255	21.7206
	rs3748034	4	3446091	T	G	0.1495	0.0234	1.81001e-10	0.251351	40.8179
	rs5745687	7	81359051	T	C	-0.3072	0.0406	2.75106e-14	0.04044	57.252
	rs6077285	20	7880890	C	G	-0.1393	0.0274	3.19499e-07	0.390256	25.8465
	rs62481625	7	155987460	C	T	-0.1091	0.0225	1.17999e-06	0.165152	23.5117
Interleukin-9 levels	rs117807175	14	62606535	C	G	-0.5143	0.1113	4.29003e-06	0.01297	21.3522
	rs3736858	13	76415379	G	C	0.1374	0.0293	2.76198e-06	0.174238	21.9907
	rs41294750	1	53550640	T	C	0.3514	0.0748	2.36499e-06	0.02913	22.0699
	rs4880409	10	134330220	T	C	-0.3355	0.0723	3.49704e-06	0.9901	21.5332
	rs61867538	11	1524506	T	C	0.3566	0.0774	3.92998e-06	0.04432	21.2266
	rs7232268	18	67768914	G	A	-0.2759	0.0587	2.52499e-06	0.9598	22.0916
	rs7242404	18	12741267	A	G	-0.1228	0.0264	3.27303e-06	0.304253	21.6366
	rs76963786	12	32039757	T	C	-0.2865	0.0557	4.49604e-07	0.04492	26.4569
Interleukin-7 levels	rs117509142	8	87134083	C	T	0.327	0.0688	1.99099e-06	0.03489	22.5901
	rs141425475	5	17679165	C	T	0.4781	0.1016	2.53099e-06	0.02111	22.1437
	rs144701438	18	63960405	A	G	-0.4819	0.0989	9.75304e-07	0.01487	23.7422
	rs147747784	19	55118193	C	G	0.4134	0.0778	9.11906e-08	0.05079	28.2346
	rs17091524	14	56948759	C	T	-0.4924	0.1013	1.91399e-06	0.01719	23.6275
	rs218247	4	55397736	C	G	-0.1352	0.0286	2.30802e-06	0.257353	22.3471
	rs28793375	8	41415618	T	C	0.1638	0.0361	4.46396e-06	0.197952	20.588
	rs4320361	6	43928511	T	G	-0.3245	0.0249	6.86752e-39	0.408082	169.836
	rs62006410	14	103007935	T	C	-0.1557	0.0303	3.38704e-07	0.183397	26.4054
	rs75904417	2	168653321	C	A	0.1698	0.0349	1.16201e-06	0.1466	23.6714
	rs77981494	16	17544866	C	T	0.5178	0.1064	1.06699e-06	0.0373	23.6832
	rs8175379	5	46263543	A	T	0.1307	0.0285	4.37804e-06	0.7353	21.0311
Interleukin-5 levels	rs11680908	2	110076751	G	A	-0.2634	0.0554	2.03002e-06	0.0508	22.6054
	rs6737109	2	23179531	C	T	-0.116	0.0247	2.399e-06	0.34769	22.0558
	rs72831687	6	16092360	A	G	-0.5239	0.1109	1.69099e-06	0.01671	22.3169
	rs73040130	19	36746190	C	T	-0.2638	0.0529	6.00399e-07	0.05578	24.8678
	rs7578892	2	214953648	G	C	0.1173	0.0249	2.43703e-06	0.436219	22.192
	rs7767396	6	43927050	G	A	-0.1515	0.0246	7.69006e-10	0.408225	37.9276
Interleukin-4 levels	rs10512267	9	102190129	C	T	0.0824	0.0161	2.93697e-07	0.547103	26.1941
	rs116705532	1	113705169	G	T	0.4678	0.0978	1.75501e-06	0.007373	22.8793
	rs117146485	9	138824257	C	T	0.2924	0.0629	2.70901e-06	0.01819	21.6099
	rs13106889	4	175960753	A	T	-0.1161	0.0225	2.27201e-07	0.182202	26.6256
	rs17713451	7	151162472	A	G	0.1274	0.0253	4.97004e-07	0.1126	25.357
	rs2849346	18	71086147	G	C	-0.077	0.0165	2.86702e-06	0.282637	21.7778
	rs4444693	3	11704885	A	T	0.0881	0.0184	1.70098e-06	0.712877	22.9254
	rs73023729	6	159654030	A	G	-0.1796	0.0366	9.03296e-07	0.0452	24.0797
	rs7613691	3	147653591	G	A	-0.1775	0.0384	4.048e-06	0.0593561	21.3665
	rs79597994	1	151803047	T	C	-0.5831	0.127	4.31698e-06	0.007096	21.0804
	rs9508291	13	29710620	C	T	0.1676	0.0359	3.03201e-06	0.095924	21.7951
	rs9941733	20	374061	G	A	-0.114	0.0229	6.88098e-07	0.145743	24.7821
Interleukin-2 receptor antagonist levels	rs11241559	5	119976700	G	T	0.1264	0.0266	2.00198e-06	0.824083	22.5804
	rs117244812	17	6443310	A	G	-0.7064	0.1488	2.10199e-06	0.007292	22.537
	rs12722497	10	6095928	A	C	0.6279	0.0485	1.57217e-38	0.06763	167.609
	rs185231391	3	59359679	C	T	-0.8503	0.1809	1.47001e-06	0.006079	22.0936
	rs4733117	8	32137610	C	A	-0.1369	0.0292	2.627e-06	0.187592	21.9807
	rs61705228	4	101196302	T	C	0.3303	0.0716	3.98804e-06	0.03655	21.281
	rs759244	4	25058323	A	T	-0.1126	0.0239	2.42901e-06	0.271274	22.1963
	rs929551	2	37914930	G	C	-0.1686	0.0352	1.61102e-06	0.115635	22.9419
Interleukin-2 levels	rs12051139	16	86918674	C	T	0.1131	0.0247	4.76201e-06	0.516145	20.9668
	rs13412535	2	224874874	A	G	0.1764	0.0332	1.181e-07	0.204126	28.2307
	rs170117	4	55390380	T	C	-0.1617	0.0349	3.86696e-06	0.222181	21.4669
	rs2807544	1	15204245	G	A	-0.1175	0.0253	3.41201e-06	0.566719	21.5692
	rs4634519	7	67192928	G	A	0.1261	0.0269	2.76898e-06	0.273363	21.9748
	rs56254584	21	15273744	G	C	-0.1303	0.0285	4.83704e-06	0.3729	20.9025
	rs61335305	15	66453074	A	C	0.4514	0.0918	7.31897e-07	0.0184	24.179
	rs62124990	2	19238636	T	G	-0.6961	0.1495	3.21899e-06	0.0189	21.6801
	rs7615304	3	156675703	G	A	0.1172	0.0242	1.21001e-06	0.645638	23.4544
	rs7806875	7	120888143	T	A	-0.1192	0.0248	1.46599e-06	0.235804	23.102
	rs80336398	3	64060934	C	T	-0.4001	0.0858	2.81702e-06	0.02572	21.7452
Interferon gamma levels	rs10487554	7	149367686	A	G	-0.0895	0.0183	1.087e-06	0.154423	23.919
	rs10761731	10	65027610	T	A	0.0826	0.0167	8.08891e-07	0.433438	24.464
	rs115729819	4	169704667	G	A	-0.2484	0.0515	1.38201e-06	0.02753	23.2642
	rs11843756	13	49254892	G	T	-0.184	0.0393	3.08901e-06	0.0540223	21.9205
	rs12420286	11	103777894	C	T	-0.2376	0.0501	2.083e-06	0.02826	22.4914
	rs1867282	9	102172147	T	C	0.0774	0.0166	3.15203e-06	0.532015	21.7403
	rs2073438	17	6900076	A	G	0.0898	0.0188	1.67598e-06	0.257933	22.8159
	rs2188420	7	106486243	G	C	-0.0987	0.0202	1.03001e-06	0.374215	23.8744
	rs73479333	6	82978930	C	G	-0.1159	0.024	1.34301e-06	0.279126	23.3209
	rs74148555	10	92079842	T	C	-0.3732	0.0774	2.635e-06	0.00909635	23.2488
	rs78296352	1	22821844	T	G	0.343	0.0652	1.38299e-07	0.01401	27.6753
										#DIV/0!
Growth-regulated protein alpha levels	rs1113500	1	108595442	T	G	0.1174	0.0244	1.57101e-06	0.514193	23.1503
	rs12075	1	159175354	A	G	0.3751	0.0237	1.24394e-55	0.285925	250.494
	rs140734053	10	5401459	A	G	0.7257	0.1561	3.578e-06	0.008702	21.6127
	rs185768063	6	16494983	G	A	-0.3998	0.076	1.456e-07	0.02707	27.6731
	rs2422841	20	3080352	A	G	-0.1657	0.0361	4.65597e-06	0.8555	21.0684
	rs508977	4	74762383	G	T	0.3802	0.028	7.55788e-42	0.37828	184.378
	rs62024303	15	88871162	G	A	0.3053	0.0666	4.40798e-06	0.04242	21.0138
	rs78653452	20	9762055	T	G	-0.7362	0.1558	1.20801e-06	0.0753813	22.3284
Granulocyte-colony stimulating factor levels	rs115256310	5	71399691	G	A	0.6821	0.136	6.72605e-07	0.007026	25.1547
	rs11903143	2	29592460	G	A	-0.087	0.0176	6.35199e-07	0.178552	24.435
	rs139692213	1	70776851	A	T	-0.6028	0.1336	4.79601e-06	0.008818	20.3579
	rs145756094	9	29106805	G	C	0.7408	0.1479	5.52599e-07	0.003689	25.088
	rs147128865	9	34972766	T	C	0.27	0.0587	4.923e-06	0.02251	21.1569
	rs1817411	8	98598328	T	C	0.089	0.0191	3.09899e-06	0.295593	21.7127
	rs2324653	4	25057662	C	G	-0.0808	0.0161	5.03304e-07	0.595153	25.1867
	rs2671444	12	101552075	A	G	-0.0784	0.0166	2.48399e-06	0.724986	22.3057
	rs74148555	10	92079842	T	C	-0.3715	0.0755	1.55099e-06	0.00909635	24.2116
	rs76287671	19	44122296	T	C	0.0938	0.0189	6.92102e-07	0.2404	24.631
	rs77318030	19	55055897	C	T	0.2045	0.0428	2.21101e-06	0.04262	22.8296
Fibroblast growth factor basic levels	rs116920326	14	92208121	C	G	-0.2435	0.0534	4.95302e-06	0.02127	20.7929
	rs13412535	2	224874874	A	G	-0.1112	0.0225	7.34497e-07	0.204126	24.4256
	rs16873997	5	71308330	G	C	0.4922	0.1048	2.99302e-06	0.0579821	22.0577
	rs61990749	14	78372501	C	G	0.1116	0.0229	1.244e-06	0.188114	23.7497
	rs747334	10	92744744	G	A	-0.0751	0.0164	4.52804e-06	0.665536	20.9697
	rs75168112	18	71086067	C	T	0.1001	0.0214	2.99902e-06	0.1982	21.8797
	rs9907295	17	34257313	T	C	-0.1319	0.0269	7.94804e-07	0.159939	24.0428
Eotaxin levels	rs11087905	21	25505329	A	C	0.0941	0.0189	5.47697e-07	0.420611	24.7888
	rs112347425	3	46460888	T	C	0.158	0.0277	8.64709e-09	0.09074	32.5353
	rs12075	1	159175354	A	G	0.1671	0.0156	1.33199e-26	0.285925	114.737
	rs1476670	1	44508195	C	A	0.1007	0.0217	3.51399e-06	0.8364	21.5347
	rs187131	1	91504337	G	C	-0.1291	0.0254	3.57298e-07	0.0823131	25.8336
	rs2024050	7	75460393	G	A	-0.1728	0.0303	1.104e-08	0.9278	32.5239
	rs2210755	9	80223823	C	T	0.1104	0.0242	4.854e-06	0.0727485	20.8117
	rs2211994	21	18047593	C	T	-0.0885	0.0177	6.07897e-07	0.82204	25
	rs2228467	3	42906116	C	T	0.4163	0.0292	2.27091e-46	0.07578	203.258
	rs2419841	10	115335983	C	T	0.1277	0.0279	4.97794e-06	0.0687721	20.9495
	rs5746492	22	18393933	G	A	-0.0954	0.0207	3.95904e-06	0.217889	21.2401
	rs5754733	22	34269594	A	C	-0.1042	0.0214	1.06299e-06	0.791267	23.7087
	rs59808887	5	31846520	T	C	-0.1673	0.0358	2.91099e-06	0.163562	21.8387
	rs75426604	14	35857714	A	C	-0.1366	0.0291	2.52802e-06	0.0568549	22.0351
	rs79722574	17	32619052	T	C	-0.1113	0.0228	1.06101e-06	0.129226	23.8298
	rs9317045	13	59630038	C	A	-0.1182	0.0237	5.82197e-07	0.237015	24.8736
