# Supplementary material for: The causal effects of circulating cytokines on sepsis: a Mendelian randomization study
Source: PeerJ. 2024 Feb 1;12:e16860. doi: 10.7717/peerj.16860 (PMC10838533; doi:10.7717/peerj.16860)
Supplement: Supplemental Information 9 [file peerj-12-16860-s009.xlsx]

## Sheet: res-cytokine-sepsis
Table s3. MR analysis of risk of sepsis
	Method	No. SNP	Beta	SE	OR	95%CI	Pvalue	LOW	UP
CTACK levels	MR Egger	12	-0.029185	0.0544774	0.971237	0.873-1.081	0.603858	0.872877	1.08068
	Weighted median	12	0.018145	0.0356214	1.01831	0.950-1.092	0.610483	0.949639	1.09195
	Inverse variance weighted	12	-0.00622557	0.0262251	0.993794	0.944-1.046	0.812355	0.944002	1.04621
	Simple mode	12	-0.0286897	0.0598231	0.971718	0.864-1.093	0.640923	0.864207	1.0926
	Weighted mode	12	0.0215653	0.044862	1.0218	0.936-1.116	0.640146	0.93579	1.11571
beta-nerve growth factor levels	MR Egger	8	0.203792	0.21267	1.22604	0.808-1.860	0.374937	0.808124	1.86009
	Weighted median	8	0.10583	0.0514432	1.11163	1.005-1.230	0.0396646	1.00501	1.22956
	Inverse variance weighted	8	0.113675	0.0396627	1.12039	1.037-1.211	0.00415631	1.03659	1.21096
	Simple mode	8	0.126185	0.0761817	1.13449	0.977-1.317	0.141617	0.977134	1.31719
	Weighted mode	8	0.121359	0.0758861	1.12903	0.973-1.310	0.153802	0.972994	1.31009
Vascular endothelial growth factor levels	MR Egger	10	0.187033	0.148952	1.20567	0.900-1.614	0.244672	0.900402	1.61443
	Weighted median	10	-0.00418329	0.054052	0.995825	0.896-1.107	0.93831	0.895722	1.10712
	Inverse variance weighted	10	0.0349137	0.0408138	1.03553	0.956-1.122	0.392309	0.95592	1.12177
	Simple mode	10	-0.00963682	0.0751871	0.990409	0.855-1.148	0.900832	0.854701	1.14767
	Weighted mode	10	-0.0083287	0.068507	0.991706	0.867-1.134	0.905907	0.867099	1.13422
Macrophage Migration Inhibitory Factor levels	MR Egger	9	-0.0466596	0.0655047	0.954412	0.839-1.085	0.49932	0.839416	1.08516
	Weighted median	9	-0.0154002	0.0445591	0.984718	0.902-1.075	0.729634	0.902365	1.07459
	Inverse variance weighted	9	0.00869709	0.0366429	1.00874	0.939-1.084	0.812387	0.938828	1.08385
	Simple mode	9	-0.0242781	0.0607637	0.976014	0.866-1.099	0.699943	0.866429	1.09946
	Weighted mode	9	-0.0276765	0.0597242	0.972703	0.865-1.093	0.65542	0.865251	1.0935
TRAIL levels	MR Egger	17	0.022761	0.0282188	1.02302	0.968-1.081	0.432505	0.967976	1.0812
	Weighted median	17	0.0214994	0.0273766	1.02173	0.968-1.078	0.432264	0.968353	1.07805
	Inverse variance weighted	17	0.0157158	0.0216418	1.01584	0.974-1.060	0.467731	0.973651	1.05986
	Simple mode	17	0.0241869	0.0395834	1.02448	0.948-1.107	0.549759	0.948004	1.10713
	Weighted mode	17	0.026155	0.0265951	1.0265	0.974-1.081	0.340023	0.974363	1.08143
Tumor necrosis factor beta levels	MR Egger	4	-0.0128556	0.0370769	0.987227	0.918-1.062	0.761878	0.918029	1.06164
	Weighted median	4	0.00609681	0.02659	1.00612	0.955-1.060	0.818644	0.955023	1.05994
	Inverse variance weighted	4	0.0217929	0.0287726	1.02203	0.966-1.081	0.4488	0.96599	1.08132
	Simple mode	4	0.00922663	0.0408174	1.00927	0.932-1.093	0.835691	0.931671	1.09333
	Weighted mode	4	0.00499024	0.0289159	1.005	0.950-1.064	0.873969	0.949628	1.06361
Tumor necrosis factor alpha levels	MR Egger	5	0.0787271	0.0637721	1.08191	0.955-1.226	0.304895	0.954788	1.22596
	Weighted median	5	0.00619215	0.0557768	1.00621	0.902-1.122	0.911603	0.902009	1.12245
	Inverse variance weighted	5	-0.007128	0.0485814	0.992897	0.903-1.092	0.883351	0.902716	1.09209
	Simple mode	5	-0.0303974	0.0846241	0.97006	0.822-1.145	0.737601	0.821798	1.14507
	Weighted mode	5	0.0341072	0.0709387	1.0347	0.900-1.189	0.655775	0.900385	1.18904
Stromal-cell-derived factor 1 alpha levels	MR Egger	9	0.0259624	0.0927607	1.0263	0.856-1.231	0.787655	0.855689	1.23093
	Weighted median	9	0.0484953	0.0678029	1.04969	0.919-1.199	0.474461	0.919065	1.19888
	Inverse variance weighted	9	0.0402873	0.0533824	1.04111	0.938-1.156	0.450433	0.937684	1.15594
	Simple mode	9	-0.022153	0.092142	0.978091	0.816-1.172	0.816049	0.816481	1.17169
	Weighted mode	9	0.0503148	0.0761402	1.0516	0.906-1.221	0.527296	0.905815	1.22085
Stem cell growth factor beta levels	MR Egger	15	0.0285608	0.0535309	1.02897	0.926-1.143	0.602664	0.926483	1.1428
	Weighted median	15	-0.0137305	0.0379249	0.986363	0.916-1.062	0.717318	0.915703	1.06248
	Inverse variance weighted	15	0.0149764	0.0285518	1.01509	0.960-1.074	0.599906	0.959843	1.07351
	Simple mode	15	-0.0501534	0.0772511	0.951084	0.817-1.107	0.526701	0.81745	1.10656
	Weighted mode	15	-0.0702403	0.0653131	0.93217	0.820-1.059	0.300363	0.820162	1.05947
Stem cell factor levels	MR Egger	11	0.0518474	0.124244	1.05321	0.826-1.344	0.686235	0.825579	1.34362
	Weighted median	11	-0.0560796	0.0628229	0.945464	0.836-1.069	0.372039	0.835928	1.06935
	Inverse variance weighted	11	-0.0395334	0.054798	0.961238	0.863-1.070	0.47064	0.863348	1.07023
	Simple mode	11	-0.0590551	0.0891557	0.942655	0.792-1.123	0.522698	0.79152	1.12265
	Weighted mode	11	-0.0486356	0.0749402	0.952528	0.822-1.103	0.530965	0.822408	1.10324
Interleukin-16 levels	MR Egger	9	-0.0569768	0.0376245	0.944616	0.877-1.017	0.173708	0.877463	1.01691
	Weighted median	9	-0.0312428	0.0284763	0.96924	0.917-1.025	0.272574	0.916625	1.02487
	Inverse variance weighted	9	-0.030688	0.0226879	0.969778	0.928-1.014	0.17618	0.927598	1.01388
	Simple mode	9	-0.0155255	0.0492202	0.984594	0.894-1.084	0.760506	0.894047	1.08431
	Weighted mode	9	-0.0421861	0.0311053	0.958691	0.902-1.019	0.21206	0.901989	1.01896
RANTES levels	MR Egger	8	-0.134854	0.097978	0.873844	0.721-1.059	0.217866	0.721163	1.05885
	Weighted median	8	-0.111841	0.0553568	0.894186	0.802-0.997	0.0433447	0.802246	0.996663
	Inverse variance weighted	8	-0.0833818	0.0407747	0.92	0.849-0.997	0.0408606	0.849336	0.996543
	Simple mode	8	-0.118336	0.0776384	0.888398	0.763-1.034	0.171284	0.762992	1.03441
	Weighted mode	8	-0.112688	0.0724884	0.893429	0.775-1.030	0.163998	0.775098	1.02983
Platelet-derived growth factor BB levels	MR Egger	14	0.121729	0.0702315	1.12945	0.984-1.296	0.108643	0.984202	1.29613
	Weighted median	14	0.0942448	0.0425647	1.09883	1.011-1.194	0.0268181	1.01088	1.19443
	Inverse variance weighted	14	0.0520172	0.0369772	1.05339	0.980-1.133	0.159506	0.97975	1.13257
	Simple mode	14	0.0739388	0.0768776	1.07674	0.926-1.252	0.353713	0.926129	1.25185
	Weighted mode	14	0.093875	0.0423603	1.09842	1.011-1.194	0.0451411	1.01091	1.19351
Macrophage inflammatory protein 1b levels	MR Egger	20	-0.0384826	0.0315173	0.962248	0.905-1.024	0.23784	0.904605	1.02356
	Weighted median	20	-0.0238826	0.0267356	0.9764	0.927-1.029	0.371702	0.926553	1.02893
	Inverse variance weighted	20	-0.0274852	0.0206684	0.972889	0.934-1.013	0.183578	0.934265	1.01311
	Simple mode	20	-0.0516464	0.0478262	0.949665	0.865-1.043	0.293714	0.864689	1.04299
	Weighted mode	20	-0.0281656	0.0285064	0.972227	0.919-1.028	0.335547	0.919396	1.02809
Macrophage inflammatory protein 1a levels	MR Egger	7	-0.124145	0.122256	0.883251	0.695-1.122	0.35648	0.695053	1.12241
	Weighted median	7	-0.0223174	0.059036	0.97793	0.871-1.098	0.705408	0.871074	1.09789
	Inverse variance weighted	7	-0.0174567	0.0449864	0.982695	0.900-1.073	0.697983	0.899757	1.07328
	Simple mode	7	-0.0234434	0.0857705	0.976829	0.826-1.156	0.793767	0.825675	1.15565
	Weighted mode	7	-0.037285	0.0826453	0.963402	0.819-1.133	0.667732	0.819329	1.13281
Monokine induced by gamma interferon levels	MR Egger	14	-0.0313048	0.0558379	0.96918	0.869-1.081	0.585361	0.868709	1.08127
	Weighted median	14	-0.038468	0.0409813	0.962262	0.888-1.043	0.3479	0.887993	1.04274
	Inverse variance weighted	14	0.000303908	0.0291307	1.0003	0.945-1.059	0.991676	0.94479	1.05908
	Simple mode	14	-0.0821243	0.0829462	0.921157	0.783-1.084	0.340201	0.78294	1.08378
	Weighted mode	14	-0.0863152	0.0689023	0.917305	0.801-1.050	0.232375	0.801425	1.04994
Macrophage colony stimulating factor levels	MR Egger	9	-0.0254632	0.0484062	0.974858	0.887-1.072	0.615115	0.88662	1.07188
	Weighted median	9	-0.0405796	0.0341056	0.960233	0.898-1.027	0.234116	0.898142	1.02662
	Inverse variance weighted	9	-0.047282	0.0255796	0.953818	0.907-1.003	0.0645405	0.907177	1.00286
	Simple mode	9	-0.0269457	0.0521639	0.973414	0.879-1.078	0.619436	0.87881	1.0782
	Weighted mode	9	-0.00838668	0.048363	0.991648	0.902-1.090	0.866636	0.901966	1.09025
Monocyte chemoattractant protein-3 levels	MR Egger	4	-0.0312793	0.0847614	0.969205	0.821-1.144	0.747512	0.820853	1.14437
	Weighted median	4	-0.03322	0.0400848	0.967326	0.894-1.046	0.40725	0.894235	1.04639
	Inverse variance weighted	4	-0.0388419	0.0328679	0.961903	0.902-1.026	0.237302	0.90189	1.02591
	Simple mode	4	-0.0216529	0.0518415	0.97858	0.884-1.083	0.704278	0.884032	1.08324
	Weighted mode	4	-0.0231945	0.0457743	0.977072	0.893-1.069	0.647251	0.893229	1.06879
Monocyte chemoattractant protein-1 levels	MR Egger	15	0.0146541	0.0662299	1.01476	0.891-1.155	0.828326	0.891227	1.15542
	Weighted median	15	-0.0415322	0.0486568	0.959318	0.872-1.055	0.393342	0.872058	1.05531
	Inverse variance weighted	15	-0.0575347	0.032807	0.944089	0.885-1.007	0.0794769	0.885293	1.00679
	Simple mode	15	-0.150687	0.0788326	0.860117	0.737-1.004	0.0766323	0.736976	1.00383
	Weighted mode	15	-0.0527225	0.0582614	0.948643	0.846-1.063	0.380812	0.846272	1.0634
Interleukin-12p70 levels	MR Egger	14	0.0632742	0.0586059	1.06532	0.950-1.195	0.301518	0.949715	1.19499
	Weighted median	14	0.0371697	0.0351655	1.03787	0.969-1.112	0.290515	0.968744	1.11193
	Inverse variance weighted	14	0.0222148	0.0345048	1.02246	0.956-1.094	0.519693	0.955601	1.094
	Simple mode	14	0.0525953	0.0661224	1.054	0.926-1.200	0.44065	0.925886	1.19985
	Weighted mode	14	0.0393332	0.0362889	1.04012	0.969-1.117	0.298107	0.968707	1.11679
Interferon gamma-induced protein 10 levels	MR Egger	9	-0.00970955	0.0602818	0.990337	0.880-1.115	0.876589	0.879975	1.11454
	Weighted median	9	-0.0413586	0.0467215	0.959485	0.876-1.051	0.37604	0.875524	1.0515
	Inverse variance weighted	9	-0.0545345	0.0345922	0.946926	0.885-1.013	0.114911	0.884852	1.01335
	Simple mode	9	-0.0404806	0.0668553	0.960328	0.842-1.095	0.56163	0.842386	1.09478
	Weighted mode	9	-0.037622	0.0623343	0.963077	0.852-1.088	0.562859	0.852317	1.08823
Interleukin-18 levels	MR Egger	19	-0.0137822	0.0403667	0.986312	0.911-1.068	0.736967	0.911284	1.06752
	Weighted median	19	0.0031991	0.0289892	1.0032	0.948-1.062	0.912128	0.947792	1.06186
	Inverse variance weighted	19	-0.00761896	0.0211311	0.99241	0.952-1.034	0.718431	0.952147	1.03438
	Simple mode	19	0.0175315	0.0552794	1.01769	0.913-1.134	0.754784	0.913186	1.13414
	Weighted mode	19	-0.0638405	0.0436743	0.938155	0.861-1.022	0.161051	0.861188	1.022
Interleukin-17 levels	MR Egger	12	-0.109759	0.107864	0.89605	0.725-1.107	0.332868	0.725298	1.107
	Weighted median	12	0.015261	0.0680915	1.01538	0.889-1.160	0.82266	0.88852	1.16035
	Inverse variance weighted	12	0.0482155	0.0564639	1.0494	0.939-1.172	0.393151	0.939457	1.1722
	Simple mode	12	0.184364	0.134158	1.20245	0.924-1.564	0.196722	0.924423	1.56411
	Weighted mode	12	-0.0344663	0.0950063	0.966121	0.802-1.164	0.723644	0.801974	1.16386
Interleukin-13 levels	MR Egger	8	0.0725303	0.0603261	1.07523	0.955-1.210	0.274538	0.95532	1.21018
	Weighted median	8	0.04119	0.0500379	1.04205	0.945-1.149	0.410408	0.944703	1.14943
	Inverse variance weighted	8	0.033827	0.0380008	1.03441	0.960-1.114	0.373377	0.960161	1.11439
	Simple mode	8	-0.0392206	0.0960227	0.961539	0.797-1.161	0.695148	0.796582	1.16065
	Weighted mode	8	0.117159	0.0621914	1.1243	0.995-1.270	0.10159	0.995275	1.27005
Interleukin-10 levels	MR Egger	11	0.105587	0.0893183	1.11136	0.933-1.324	0.26744	0.932882	1.32399
	Weighted median	11	0.0449063	0.0455316	1.04593	0.957-1.144	0.324002	0.956633	1.14356
	Inverse variance weighted	11	0.00957496	0.0438059	1.00962	0.927-1.100	0.82698	0.926552	1.10014
	Simple mode	11	0.0204642	0.0827049	1.02067	0.868-1.200	0.809577	0.867936	1.20029
	Weighted mode	11	0.0438426	0.0445016	1.04482	0.958-1.140	0.347766	0.957547	1.14004
Interleukin-8 levels	MR Egger	4	-0.0638017	0.0730901	0.938191	0.813-1.083	0.474754	0.812972	1.0827
	Weighted median	4	-0.0620756	0.0504056	0.939812	0.851-1.037	0.218128	0.851402	1.0374
	Inverse variance weighted	4	-0.0604657	0.0436351	0.941326	0.864-1.025	0.165834	0.864166	1.02538
	Simple mode	4	-0.066567	0.0670048	0.9356	0.820-1.067	0.393713	0.820455	1.06691
	Weighted mode	4	-0.0621002	0.0589164	0.939789	0.837-1.055	0.369255	0.837297	1.05483
Interleukin-6 levels	MR Egger	8	-0.0113852	0.096876	0.988679	0.818-1.195	0.91028	0.817698	1.19541
	Weighted median	8	-0.0340668	0.068943	0.966507	0.844-1.106	0.621214	0.844344	1.10634
	Inverse variance weighted	8	-0.0995765	0.0518538	0.905221	0.818-1.002	0.054816	0.817741	1.00206
	Simple mode	8	-0.0168467	0.112505	0.983294	0.789-1.226	0.885192	0.78871	1.22589
	Weighted mode	8	-0.0142034	0.0914678	0.985897	0.824-1.179	0.880981	0.824086	1.17948
Interleukin-1-receptor antagonist levels	MR Egger	9	-0.135366	0.0970466	0.873396	0.722-1.056	0.20572	0.72211	1.05638
	Weighted median	9	-0.0447333	0.0507026	0.956253	0.866-1.056	0.377632	0.865792	1.05616
	Inverse variance weighted	9	-0.0438391	0.0388547	0.957108	0.887-1.033	0.2592	0.886925	1.03284
	Simple mode	9	-0.0251832	0.0734969	0.975131	0.844-1.126	0.740696	0.844309	1.12622
	Weighted mode	9	-0.0320181	0.0718341	0.968489	0.841-1.115	0.667613	0.841295	1.11491
Interleukin-1-beta levels	MR Egger	5	0.0969523	0.124081	1.10181	0.864-1.405	0.491582	0.863945	1.40516
	Weighted median	5	0.00217749	0.0684339	1.00218	0.876-1.146	0.974617	0.876382	1.14603
	Inverse variance weighted	5	-0.0191542	0.0560384	0.981028	0.879-1.095	0.732498	0.878983	1.09492
	Simple mode	5	0.00223858	0.0919311	1.00224	0.837-1.200	0.981739	0.836987	1.20012
	Weighted mode	5	0.00572732	0.0655076	1.00574	0.885-1.144	0.934532	0.884558	1.14353
Hepatocyte growth factor levels	MR Egger	8	0.173646	0.180087	1.18963	0.836-1.693	0.372166	0.835834	1.6932
	Weighted median	8	0.0373643	0.0685575	1.03807	0.908-1.187	0.585749	0.907548	1.18737
	Inverse variance weighted	8	0.00183327	0.0726732	1.00183	0.869-1.155	0.979875	0.868831	1.1552
	Simple mode	8	0.020722	0.0983734	1.02094	0.842-1.238	0.839164	0.841904	1.23805
	Weighted mode	8	0.0423451	0.0765554	1.04325	0.898-1.212	0.597388	0.897894	1.21215
Interleukin-9 levels	MR Egger	7	-0.0946992	0.123432	0.909647	0.714-1.159	0.477596	0.714176	1.15862
	Weighted median	7	-0.0335731	0.0562287	0.966984	0.866-1.080	0.550454	0.866077	1.07965
	Inverse variance weighted	7	-0.025249	0.0551682	0.975067	0.875-1.086	0.647187	0.875134	1.08641
	Simple mode	7	-0.138268	0.113347	0.870865	0.697-1.088	0.268284	0.697377	1.08751
	Weighted mode	7	-0.111171	0.0953955	0.894786	0.742-1.079	0.2881	0.742193	1.07875
Interleukin-7 levels	MR Egger	12	0.0627921	0.0570791	1.06481	0.952-1.191	0.29707	0.952102	1.19085
	Weighted median	12	0.0446862	0.0332683	1.0457	0.980-1.116	0.179204	0.97969	1.11616
	Inverse variance weighted	12	0.0299918	0.0247166	1.03045	0.982-1.082	0.224966	0.981717	1.08159
	Simple mode	12	0.0275835	0.0536131	1.02797	0.925-1.142	0.617088	0.925429	1.14187
	Weighted mode	12	0.040399	0.0397636	1.04123	0.963-1.126	0.331465	0.963158	1.12562
Interleukin-5 levels	MR Egger	5	0.0681169	0.165503	1.07049	0.774-1.481	0.708289	0.773933	1.48068
	Weighted median	5	-0.0561925	0.0664089	0.945357	0.830-1.077	0.397464	0.82998	1.07677
	Inverse variance weighted	5	-0.038543	0.0550253	0.96219	0.864-1.072	0.48364	0.863819	1.07176
	Simple mode	5	-0.102993	0.106829	0.902133	0.732-1.112	0.389596	0.731704	1.11226
	Weighted mode	5	-0.0985126	0.10817	0.906184	0.733-1.120	0.413959	0.733062	1.12019
Interleukin-4 levels	MR Egger	11	0.0165004	0.0733183	1.01664	0.881-1.174	0.826966	0.880555	1.17375
	Weighted median	11	0.0910678	0.0681469	1.09534	0.958-1.252	0.181437	0.95839	1.25187
	Inverse variance weighted	11	0.0795885	0.0438469	1.08284	0.994-1.180	0.0695015	0.993669	1.18002
	Simple mode	11	0.111393	0.097246	1.11783	0.924-1.353	0.278686	0.923846	1.35255
	Weighted mode	11	0.0929527	0.0727419	1.09741	0.952-1.266	0.23017	0.95159	1.26558
Interleukin-2 receptor antagonist levels	MR Egger	8	-0.00371519	0.0417299	0.996292	0.918-1.081	0.931956	0.918048	1.0812
	Weighted median	8	0.0017859	0.0325083	1.00179	0.940-1.068	0.956189	0.939948	1.0677
	Inverse variance weighted	8	-0.00572662	0.0272286	0.99429	0.943-1.049	0.833421	0.942618	1.04879
	Simple mode	8	-0.0175401	0.0501483	0.982613	0.891-1.084	0.736803	0.890626	1.0841
	Weighted mode	8	0.00202939	0.0350452	1.00203	0.936-1.073	0.955441	0.935514	1.07328
Interleukin-2 levels	MR Egger	10	-0.019282	0.0703987	0.980903	0.854-1.126	0.791103	0.854479	1.12603
	Weighted median	10	-0.0172508	0.0466525	0.982897	0.897-1.077	0.711552	0.897009	1.07701
	Inverse variance weighted	10	0.0177604	0.0347042	1.01792	0.951-1.090	0.608816	0.950982	1.08957
	Simple mode	10	-0.0110184	0.0798303	0.989042	0.846-1.157	0.893261	0.845789	1.15656
	Weighted mode	10	-0.0238708	0.0586293	0.976412	0.870-1.095	0.693413	0.870416	1.09532
Interferon gamma levels	MR Egger	13	-0.12396	0.0911751	0.883415	0.739-1.056	0.201178	0.738848	1.05627
	Weighted median	13	0.00659751	0.0649927	1.00662	0.886-1.143	0.919144	0.886222	1.14337
	Inverse variance weighted	13	-0.0345523	0.0479869	0.966038	0.879-1.061	0.471503	0.87932	1.06131
	Simple mode	13	0.0182774	0.103099	1.01845	0.832-1.247	0.862245	0.832105	1.24651
	Weighted mode	13	0.00609056	0.0872683	1.00611	0.848-1.194	0.945509	0.847932	1.19379
Growth-regulated protein alpha levels	MR Egger	9	-0.0126966	0.0665526	0.987384	0.867-1.125	0.854117	0.866633	1.12496
	Weighted median	9	-0.0214567	0.0275504	0.978772	0.927-1.033	0.436088	0.927321	1.03308
	Inverse variance weighted	9	0.0136363	0.028169	1.01373	0.959-1.071	0.628323	0.959277	1.07127
	Simple mode	9	-0.00695064	0.0400369	0.993073	0.918-1.074	0.866488	0.918124	1.07414
	Weighted mode	9	-0.0212158	0.0288197	0.979008	0.925-1.036	0.482659	0.92524	1.0359
Granulocyte-colony stimulating factor levels	MR Egger	9	0.00482046	0.0493339	1.00483	0.912-1.107	0.924901	0.91222	1.10685
	Weighted median	9	-0.00789444	0.0478984	0.992137	0.903-1.090	0.869089	0.903232	1.08979
	Inverse variance weighted	9	-0.0483001	0.0367629	0.952848	0.887-1.024	0.188904	0.886605	1.02404
	Simple mode	9	0.0256667	0.0626061	1.026	0.908-1.160	0.692585	0.907519	1.15995
	Weighted mode	9	-0.0123591	0.0474193	0.987717	0.900-1.084	0.800958	0.900054	1.08392
Fibroblast growth factor basic levels	MR Egger	8	-0.210588	0.139599	0.810108	0.616-1.065	0.182153	0.616188	1.06505
	Weighted median	8	-0.157939	0.0864056	0.853902	0.721-1.011	0.0675683	0.720872	1.01148
	Inverse variance weighted	8	-0.140597	0.0645335	0.86884	0.766-0.986	0.0293565	0.76561	0.985988
	Simple mode	8	-0.123129	0.122663	0.88415	0.695-1.124	0.348906	0.695205	1.12445
	Weighted mode	8	-0.156439	0.102342	0.855184	0.700-1.045	0.170211	0.699752	1.04514
Eotaxin levels	MR Egger	15	-0.0757298	0.084904	0.927067	0.785-1.095	0.388633	0.784945	1.09492
	Weighted median	15	-0.0623421	0.045631	0.939561	0.859-1.027	0.171869	0.859178	1.02747
	Inverse variance weighted	15	-0.0408613	0.0341969	0.959962	0.898-1.027	0.232132	0.897729	1.02651
	Simple mode	15	-0.0822848	0.0704377	0.92101	0.802-1.057	0.262238	0.802244	1.05736
	Weighted mode	15	-0.0652672	0.0536458	0.936817	0.843-1.041	0.243857	0.843317	1.04068
